# Supplementary material for: Equity Impact Assessment of Interventions to Promote Physical Activity among Older Adults: A Logic Model Framework
Source: PubMed Central journal article supplement (PMC6388141; doi:10.3390/ijerph16030420), 2019-02-01
Supplement: ijerph-16-00420-s001.pdf [file ijerph-16-00420-s001.pdf]

## Supplementary File

**Table S1.** Interview guidelines for researchers and practitioners on social inequalities-sensitive physical activity promotion in older adults.

| Interview questions for researchers                                                                                                                                                                                                                                                                                                                                                                                                                                                                                                                                                                                                                                                                                                                             | Interview questions for practitioners                                                                                                                                                                                                                                                                                                                                                                                                                                                                                                                                                                                                                                                                                                                                                                                                                                                                                                                             |
|-----------------------------------------------------------------------------------------------------------------------------------------------------------------------------------------------------------------------------------------------------------------------------------------------------------------------------------------------------------------------------------------------------------------------------------------------------------------------------------------------------------------------------------------------------------------------------------------------------------------------------------------------------------------------------------------------------------------------------------------------------------------|-------------------------------------------------------------------------------------------------------------------------------------------------------------------------------------------------------------------------------------------------------------------------------------------------------------------------------------------------------------------------------------------------------------------------------------------------------------------------------------------------------------------------------------------------------------------------------------------------------------------------------------------------------------------------------------------------------------------------------------------------------------------------------------------------------------------------------------------------------------------------------------------------------------------------------------------------------------------|
| <ul style="list-style-type: none"> <li>- Which groups of older adults warrant special attention in health promotion and prevention?</li> <li>- Which groups of older adults are reached by existing measures of physical activity promotion/health promotion and prevention, and which groups are hardly reached?</li> <li>- Are there strategies that have proven to be successful in reaching different groups of older adults?</li> </ul>                                                                                                                                                                                                                                                                                                                    | <ul style="list-style-type: none"> <li>- Which groups of older adults do you want to reach?               <ul style="list-style-type: none"> <li>- How do you define 'socioeconomically disadvantaged' older adults?</li> <li>- How did you choose these groups?</li> <li>- Which actors were involved in the selection of these groups?</li> </ul> </li> <li>- Which groups of older adults have actually been reached?</li> <li>- Which strategies have proven to be successful in reaching these groups?               <ul style="list-style-type: none"> <li>- Are there differences between different groups?</li> </ul> </li> <li>- Which strategies have proven to be less effective in reaching these groups?</li> <li>- Are there groups of older adults that have hardly been reached so far?               <ul style="list-style-type: none"> <li>- If yes: What do you think why these groups have hardly been reached so far?</li> </ul> </li> </ul> |
| <ul style="list-style-type: none"> <li>- How to consider differences related to gender, socioeconomic status, or a migration background in the development of interventions?</li> </ul>                                                                                                                                                                                                                                                                                                                                                                                                                                                                                                                                                                         | <ul style="list-style-type: none"> <li>- Do you use intervention methods to consider differences related to gender, socioeconomic status, or a migration background?</li> </ul>                                                                                                                                                                                                                                                                                                                                                                                                                                                                                                                                                                                                                                                                                                                                                                                   |
| <ul style="list-style-type: none"> <li>- Where do you see success in reaching socioeconomically disadvantaged groups, and where do you see gaps? How would you rate the current evidence?               <ul style="list-style-type: none"> <li>- What are indicators for measuring this success?</li> </ul> </li> <li>- Do you have practical experience in evaluating equity impacts of interventions ('equity impact assessment')?               <ul style="list-style-type: none"> <li>- If yes: What methods for evaluation did you use?</li> <li>- If no: Imagine you have developed an intervention and now want to investigate the impact of this intervention on social inequalities: What methods for evaluation would you use?</li> </ul> </li> </ul> | <ul style="list-style-type: none"> <li>- How are your offers evaluated?</li> <li>- How do you assess the effectiveness of your offers?</li> <li>- Are there differences in the effectiveness between different groups, such as between men and women, individuals with low and high socioeconomic status, or individuals with and without a migration background?               <ul style="list-style-type: none"> <li>- If yes: What do you think why these differences occurred?</li> </ul> </li> </ul>                                                                                                                                                                                                                                                                                                                                                                                                                                                         |
